# Supplementary figures and images for: Quantification of polyphenolic compounds and relative gene expression studies of phenylpropanoid pathway in apple (Malus domestica Borkh) in response to Venturia inaequalis infection
Source: PubMed Central journal article supplement — Saudi J Biol Sci. 2020 Sep 10;27(12):3397–404. doi: 10.1016/j.sjbs.2020.09.007 (PMC7715465; doi:10.1016/j.sjbs.2020.09.007), 2020-09-10

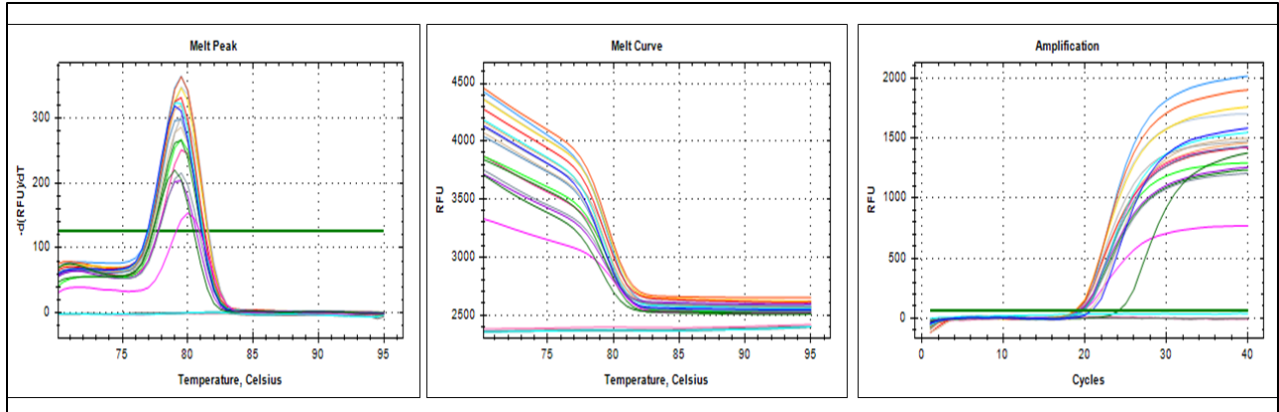

A

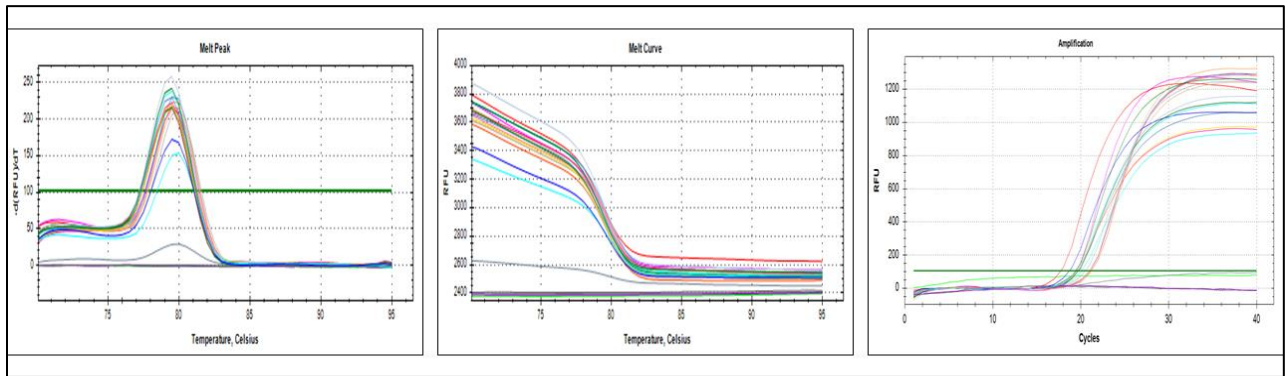

B

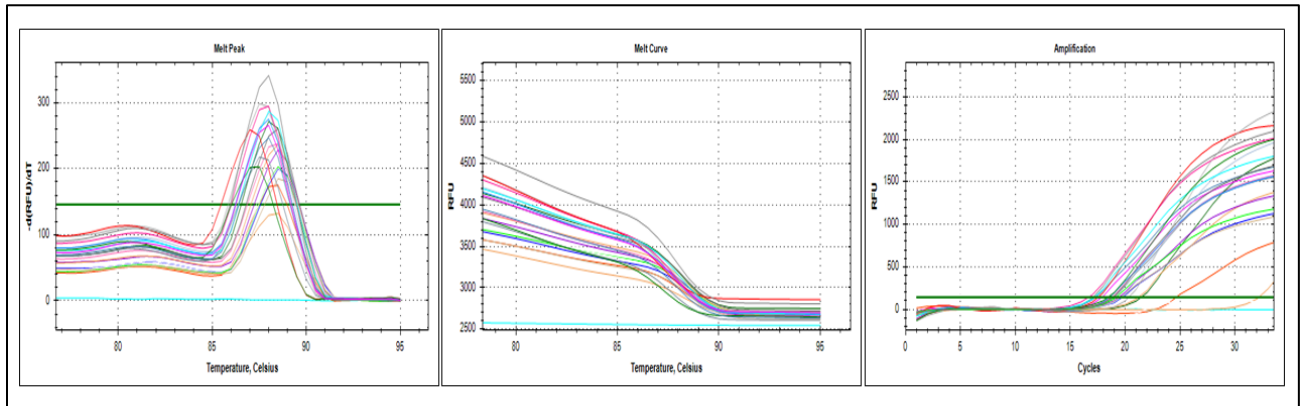

C

Fig S1: Melt peak, melt curve and amplification graphs of (A), PAL (B), CHS and (C) F3H generated in qRT-PCR.

Supplement: mmc1.pdf [file mmc1.pdf]
